# Supplementary material
Source: publisher site journal article supplement (https://www.dovepress.com/article/277008)
Supplement: Supplementary file 1 [file get_supplementary_file.php]

| Appendix 1 |  |  |
| --- | --- | --- |
| Slide 1 |  |  |
| Slide 2 |  |  |
| Slide 3 |  |  |
| Slide 4 |  |  |
| Slide 5 |  |  |
| Slide 6 |  |  |
| Slide 7 |  |  |
| Slide 8 |  |  |

Appendix 2

**A Variety of Different Types of Questions**

**Open Ended Questions:**

o What’s Going On? What do you (Mr. / Ms. Student) make of this situation? Casting question nets out to see what comes in. Listening for entry and emphasis points.

**Diagnostic Questions:**

o How do you interpret and explain “A” and “B’s” impact on the situation?

o How do you weave these points into some kind of understanding of what else is going on, possibly behind the scenes?

**Asking for Information:**

o Where…When…Who…What? Facts and opinions.

**Challenge Questions:**

o Why do you say that? How would you explain? Where is the evidence for what you say? How can you say a thing like that? Is that all? That’s just the opposite of what Student X said. Can you persuade him/her?

**Extension Questions:**

o Exploring the issues. What else? Can you take us further down the path of find new tributaries? Keep going….therefore?

**Combination Questions:**

o How would you relate your points to those mentioned by Student A or to something else you said?

**Priority Questions:**

o Which issues do you consider most important? Where do you start? How would you rank these?

**Action Questions:**

o What would you do in Person X’s shoes? How? And How (again) would you do that? (Keep asking HOW).

**Prediction Questions:**

o What do you think would happen if we followed Student Z’s action plan? Give us a forecast of your expectations. How will he/she react to your thinking?

**Generalizing and Summarizing Questions?**

o What inference can we make from this discussion and case? What generalizations would you make? How would you summarize the three most critical issues that we have

*Louis Barnes, Ph.D. and James Honan, Ed. D.*

*Harvard Graduate School of Education*

*Developing Discussion Leadership Skills Course (February, 2003)*

*Adapted from Chapter # 9 “The Discussion Teacher in Action: Questioning, Listening, and Response” In: Education for Judgment: The Artistry of Discussion Leadership. Edited by C. Roland Christensen, David Garvin, and Ann Sweet, 1991, Harvard Business School Press.4*

**Appendix # 3**

**Case # 1 (read on your own)**

*Patient is a 68-year-old man with Chronic Obstructive Pulmonary Disease (COPD) (not on home oxygen), chronic kidney disease, and atrial fibrillation on warfarin who was admitted yesterday with sepsis from multifocal pneumonia. When the team saw him in the Emergency Department yesterday, he was slightly confused, but alert and appeared comfortable on 4L O2. He was started on levofloxacin, prednisone, and nebulizers, and still hasn’t turned the corner. Overnight he had increasing O2 requirements and a fever.*

**Intern (read bolded text, then present SOAP note below)**

**You had a crazy morning, barely had time to finish pre-rounding with two new holdovers. Present the following SOAP note to your attending and resident.**

Subjective: I couldn’t really get a history for him today because he was sleepy.

Objective:

Temperature max 38.9, HR 80, BP 120/75, RR 24, 98% on 6L NC

General: Could not test orientation because he was sleepy and would only mumble.

Lungs: Some upper airway respiratory sounds, inspiratory crackles and expiratory wheezes throughout.

Data: Creatinine improving, WBC still 20K, INR 4.5 (stable from admission)

Assessment and Plan:

#Pneumonia and COPD - He seems to be stable on antibiotics and prednisone. I want to continue to monitor.

#Altered mental status - I think this is due to sepsis. I want to treat with antibiotics and continue to monitor.

#Supratherapeutic INR - This is stable, no obvious bleeding. We are holding warfarin.

**Case # 1 Scenario (read on your own)**

*Patient is a 68-year-old man with Chronic Obstructive Pulmonary Disease (COPD) (not on home oxygen), chronic kidney disease, and atrial fibrillation on warfarin who was admitted yesterday with sepsis from multifocal pneumonia. When the team saw him in the Emergency Department yesterday, he was slightly confused, but alert and appeared comfortable on 4L O2. He was started on levofloxacin, prednisone, and nebulizers, and still hasn’t turned the corner. Overnight he had increasing O2 requirements and a fever.*

**Resident (read bolded text – after your intern presents ask questions, listen, and respond)**

**It is your first rotation as a second-year resident. Your intern seems overwhelmed and sometimes does not think logically when new issues arise. You’re worried about the patient’s new mental status change and are not sure if your intern’s plan is sufficient.**

**Use 1-2 of the questioning techniques to get your intern to broaden his/her thought processes.**

**Case # 1 Scenario (read on your own)**

*Patient is a 68-year-old man with chronic obstructive lung disease (COPD) (not on home oxygen), chronic kidney disease, and atrial fibrillation on warfarin who was admitted yesterday with sepsis from multifocal pneumonia. When the team saw him in the Emergency Department yesterday, he was slightly confused but alert and appeared comfortable on 4L O2. He was started on levofloxacin, prednisone, and nebulizers, and still hasn’t turned the corner. Overnight he had increasing O2 requirements and a fever.*

**Attending (read bolded text – after your resident comments ask questions, listen, and respond)**

**Your resident is trying to give your intern autonomy, but you worry that this leads to a lack of clarity in the plans made during rounds.**

**Use 1-2 of the questioning techniques to ensure that your intern and resident understand the most pressing issues in this case and have a solid plan in place for the day.**

**Appendix # 4**

**Case # 2 Scenario (read on your own)**

*Patient is a 42-year-old East-Asian travel agent who is admitted with severe cramping abdominal pain, diarrhea, nausea, weakness and cramps in her legs twenty-four hours after attending a wedding with a catered buffet.*

*When the team saw her in the Emergency Department yesterday, she was alert, but appeared uncomfortable with lower abdominal pain. She was started on loperamide and IV fluids. This morning, she is still having diarrhea and a fever, and has evolving right lower quadrant fullness and tenderness on exam.*

**Intern (read bolded text, then present SOAP note below)**

**You’ve been up all night with a septic patient transferred to the Intensive Care Unit, and have had little chance to get to know the patient. Present the following SOAP note to your attending and resident.**

Subjective: Patient notes diffuse cramping as well as right lower quadrant pain despite loperamide overnight.

Objective:

Temperature Max 38.5, HR 90, BP 100/75, RR 18, 98% O2 sat on room air

General: Patient is anxious to get back to work, and wants a stronger anti-diarrheal medication than loperamide.

Abdomen: No scars, very active bowel sounds, moderate, diffuse tenderness with maximum tenderness in right lower quadrant where there is the suggestion of a fullness and guarding.

Data: Potassium improving from 3.2 to 3.9 overnight with repletion, WBC 11,500, with 85% Neutrophils

Assessment and Plan:

#Diarrhea and low potassium: My main differential is infectious diarrhea or food poisoning given eating at a catered buffet. More potassium is needed.

#Elevated white count and fever: Some infectious causes such as salmonella or campylobacter could cause these signs. We are awaiting cultures. I think we should stop loperamide.

#Fullness and tenderness in right lower quadrant: makes me wonder about appendicitis or inflammatory bowel disease in addition to infectious causes.

**Case # 2 Scenario (read on your own)**

*Patient is a 42-year-old East-Asian travel agent who is admitted with severe cramping abdominal pain, diarrhea, nausea, weakness and cramps in her legs twenty-four hours after attending a wedding with a catered buffet.*

*When the team saw her in the Emergency Department yesterday, she was alert, but appeared uncomfortable with lower abdominal pain. She was started on loperamide and IV fluids. This morning, she is still having diarrhea and a fever, and has evolving right lower quadrant fullness and tenderness on exam.*

**Resident (read bolded text – after your intern presents ask questions, listen, and respond)**

**You are concerned that the intern did not question loperamide as an appropriate initial therapy and may not appreciate the significance of the patient’s right lower quadrant fullness and pain. You love teaching, but worry if you second guess your intern’s decisions you will hurt his/her confidence and appear hypercritical.**

**Use 1-2 of the questioning techniques to probe your intern’s understanding of this case.**

**Case # 2 Scenario (read on your own)**

*Patient is a 42-year-old East-Asian travel agent who is admitted with severe cramping abdominal pain, diarrhea, nausea, weakness and cramps in her legs twenty-four hours after attending a wedding with a catered buffet.*

*When the team saw her in the Emergency Department yesterday, she was alert, but appeared uncomfortable with lower abdominal pain. She was started on loperamide and IV fluids. This morning, she is still having diarrhea and a fever, and has evolving right lower quadrant fullness and tenderness on exam.*

**Attending (read bolded text – after your resident comments ask questions, listen, and respond)**

**Your resident is worried about being too hard on your intern, but you are concerned this case is being mismanaged.**

**Use 1-2 of the questioning techniques to make sure your team grasps the significance of the evolving physical exam.**

**Appendix # 5 Assessment Tool for Questions Asked on Inpatient Medicine Rounds**

**Date _______**

**Floor _________ Random Number Identifier**

| Number | Question Asked | Type of Question | Person Asked | Answer Given |
| --- | --- | --- | --- | --- |
|  |  |  |  |  |
|  |  |  |  |  |
|  |  |  |  |  |
|  |  |  |  |  |
|  |  |  |  |  |
|  |  |  |  |  |
|  |  |  |  |  |
|  |  |  |  |  |
|  |  |  |  |  |

**Appendix # 6**

**Inpatient Medicine Bedside Rounds Survey**

**Date:**

**Please circle one: Attending Resident Nurse Pharmacist**

1. **Morning walk rounds were a worthwhile educational experience for you today**

Strongly agree Agree Neutral Disagree Strongly disagree

1. **Did you feel engaged in the teaching/learning on morning walk rounds today?**

Definitely engaged Somewhat engaged Neutral Not engaged Definitely not

engaged

1. **How would you make morning walk rounds more vibrant, inclusive, and high yield educationally?**

**Inpatient Medicine Bedside Rounds Patient Survey**

Date:

Please circle your anonymous response

**1. Overall, how would you rate today’s Bedside Attending Rounds?**

Excellent Very Good Good Fair Poor

1 2 3 4 5

**2. How useful was today’s bedside teaching to your overall care?**

Extremely Useful Very Useful Useful Mildly Useful Not Useful

1 2 3 4 5

**1. What did you like best about today’s Bedside Rounds?**

1.

2.

**2. Would you change anything about today’s Bedside Rounds?**

1.

2.

Appendix # 7

Surveys Nurses (%)

| Morning Walk Rounds Were a Worthwhile Experience for You Today | | Experimental  N=18 | Control  N=19 | Experimental-Control | p-Value |
| --- | --- | --- | --- | --- | --- |
| Strongly Agree | | 77.8 | 63.2 | 14.6 | 0.332 |
| Agree | | 11.1 | 26.3 | -15.2 | 0.238 |
| Neutral | | 11.1 | 10.5 | 0.6 | 0.952 |
| Disagree | | 0 | 0 | 0 | NA |
| Strongly Disagree | | 0 | 0 | 0 | NA |
| Did You Feel Engaged in Learning/Teaching on Morning Walk Rounds Today? | Experimental  N=18 | | Control  N=19 | Exp-Control | p-Value |
| Definitely Engaged | 44.4 | | 33.3 | 11.1 | 0.417 |
| Somewhat Engaged | 50 | | 55.6 | -5.6 | 0.631 |
| Neutral | 5.6 | | 11.1 | -5.5 | 0.582 |
| Not Engaged | 0 | | 0 | 0 | NA |
| Definitely Not Engaged | 0 | | 0 | 0 | NA |

Appendix # 8

Surveys Patients (%)

| Overall, how would you rate today’s bedside rounds? | Experimental  N=27 | Control  N=21 | Experimental-Control | p-Value |
| --- | --- | --- | --- | --- |
| Excellent | 63 | 71 | -8 | 0.535 |
| Very Good | 33 | 24 | 9 | 0.472 |
| Good | 0 | 5 | -5 | 0.25 |
| Fair | 0 | 0 | 0 | NA |
| Poor | 0 | 0 | 0 | NA |
| No Answer | 4 | 0 | 4 | 0.373 |
| How useful was today’s bedside teaching to your overall care? | Experimental  N=27 | Control  N-21 | Exp-Control | p-Value |
| Extremely useful | 48 | 43 | 5 | 0.719 |
| Very Useful | 37 | 24 | 13 | 0.327 |
| Useful | 11 | 24 | -13 | 0.242 |
| Mildly Useful | 4 | 10 | -6 | 0.407 |
| Not Useful | 0 | 0 | 0 | NA |

Appendix # 9: Representative Verbatim Comments from Patients Relevant to Questions

| Person Surveyed | Experimental Group | Control Group |
| --- | --- | --- |
| Patients | “Able to get questions answered on the spot. Ability to ask follow-up questions.”  “Openness of doctors, answers questions as I ask them.”  “Everyone had something to say and allowed me to ask questions without feeling rushed.”  “I love the give and take of questions by all involved.”  “Answered all my questions.”  “How thorough it was, and how the doctors asked the medical students questions, made it easier to understand what they were thinking.” | “I can ask my questions.”  “Liked the ability to go back and forth. It logically makes sense to me. It is a dynamic everyone benefits from.”  “Extremely informative for both current and long-term plan.”  “Allowing patient to be included with questions.” |
